# Supplementary material for: Using the Cancer Aging and Research Group- Breast Cancer (CARG-BC) predictive model in older adults (OA) with early breast cancer: an external validation study
Source: Research Square preprint supplement (doi:10.21203/rs.3.rs-7468335/v1), 2025-09-22
Supplement: Supplementary file 1 [file 03355c3f3bd3cafc57549cf1.docx]

**Using the Cancer Aging and Research Group- Breast Cancer (CARG-BC) predictive model in older adults (OA) with early breast cancer: an external validation study**

Neha Pathak1 MBBS, MD, DM (ORCiD: 0000-0003-1839-8558); Ashley Kimmel2; Yael Berner-Wygoda1 MD; Sulaiman A Almuthri1 MBBS; Anna Theresa Santiago3 MPH MSc; Rana Jin4 R.N. D.N.P, Susie Monginot4 R.N. MSc(A)N; Shabbir MH Alibhai4* MD MSc; Michelle B Nadler1*# MD MSc

1 Division of Medical Oncology & Hematology, Princess Margaret Cancer Centre (PMCC) and Department of Medicine, University of Toronto.

2 McMaster University, Hamilton

3 Department of Biostatistics, University Health Network (UHN)

4 Princess Margaret Cancer Centre, University Health Network, University of Toronto.

*Drs Shabbir MH Alibhai and Michelle B Nadler should be considered joint senior author for this study.

#Corresponding author:

Dr Michelle B Nadler

Medical Oncologist, Breast Site Group

Princess Margaret Cancer Centre, University Health Network

Assistant Professor, Clinician in Quality & Innovation, University of Toronto

Email: [Michelle.Nadler@uhn.ca](mailto:Michelle.Nadler@uhn.ca)

ORCiD: 0000-0002-4372-3204

**Supplementary table 1** Cancer Aging and Research Group -Breast Cancer (CARG-BC tool)

| Variable | Score |
| --- | --- |
| Stage of breast cancer  Stage I  Stage II/III | 0  3 |
| Planned use of anthracyclines  No  Yes | 0  1 |
| Duration of chemotherapy  ≤12 weeks  >12 weeks | 0  4 |
| Hemoglobin  Males  >13g/dl  ≤13g/dl  Females  >12g/dl  ≤12g/dl | 0  3  0  3 |
| Liver function test  Normal  Abnormal  (as per institutional cutoffs) | 0  3 |
| Number of falls in the last 6 months  0  ≥1 | 0  4 |
| Ability to walk a mile limited due to health  No  Yes | 0  3 |
| Availability of someone to advise on a crisis  Most or all of the time  None, little or some of the time | 0  3 |
| Risk of grade≥3 chemotoxicity:  Low risk  Intermediate risk  High risk | 0-5  6-11  12-24 |
| *Adapted from: Magnuson et al. JCO 2021 Feb 20 [cited 2023 Aug 28];39(6):608–181* | |

**Supplementary table 2** Chemotherapy protocol modifications

| Chemotherapy Modification | Definition |
| --- | --- |
| Dose delay | Calculated as the sum of the actual days minus the theoretical days from the initiation of chemotherapy to the first day of the last cycle. Delay per cycle will be calculated as the dose delay divided by the number of cycles. |
| Discontinuation | Administration of fewer cycles than planned initially. |
| Dose reduction | Any documented reduction in CT planned upfront at the start of therapy based on the clinician’s judgement or subsequent reduction due to toxicity. |
| Deviation from protocol | Whether a whether a different chemotherapy regimen was chosen based on the patient’s age/co-morbidities as compared to expected standard of care chemotherapy (that would have been indicated had the patient been younger/more fit). |
| Relative dose intensity (RDI) | RDI is defined as the ratio of the delivered dose intensity (per unit body surface area per unit time [mg/m2 per week]) to the planned dose intensity for a chemotherapy regimen16. We will consider the cut off of <85% RDI for analysis2 |

**Supplementary table 3** Grade ≥3 adverse effects experienced by the patient population

| Grade 3 or higher Adverse Effect$ |  | Patients (%) |  |
| --- | --- | --- | --- |
| Fatigue |  | 49 (20.2) |  |
| Neutropenia |  | 37 (15.2) |  |
| Other# |  | 34 (14.0) |  |
| Peripheral neuropathy |  | 31 (12.8) |  |
| Infection without neutropenia |  | 19 (7.8) |  |
| Anemia |  | 18 (7.4) |  |
| Diarrhea |  | 15 (6.2) |  |
| Febrile Neutropenia |  | 12 (4.9) |  |
| Syncope |  | 11 (4.5) |  |
| Dyspnea |  | 8 (3.3) |  |
| Hypokalemia |  | 6 (2.5) |  |
| Thromboembolism |  | 5 (2.1) |  |
| Hyponatremia |  | 4 (1.6) |  |
| Skin related toxicities |  | 4 (1.6) |  |
| Vomiting |  | 3 (1.2) |  |
| Dehydration |  | 3 (1.2) |  |
| Thrombocytopenia |  | 3 (1.2) |  |
| Lymphopenia |  | 3 (1.2) |  |
| Cardiac failure |  | 3 (1.2) |  |
| Nausea |  | 2 (0.8) |  |
| Peripheral edema |  | 2 (0.8) |  |
| Acute Kidney Injury |  | 2 (0.8) |  |
| Hyperkalemia |  | 1 (0.4) |  |
| Hepatic failure |  | 1 (0.4) |  |
| Decrease in Cardiac Ejection Fraction |  | 1 (0.4) |  |
| Arrhythmia |  | 1 (0.4) |  |
| Allergic reaction |  | 1 (0.4) |  |
| #Other adverse effects commonly included:  $One patient could have more than 1 toxicity and the maximum grade of each toxicity experienced throughout the duration of chemotherapy and follow up is documented. | | | |

**Supplementary table 4** Predictive ability of the CARG BC score excluding the falls variable as sensitivity analysis

| Predictive Performance of CARG-BC (No Falls) in Classifying Grade 3+ Toxicity | |
| --- | --- |
| **Measure** | **Value (95% CI)** |
| Accuracy | 71.6 (65.5, 77.2) |
| Sensitivity | 77.9 (69.8, 84.6) |
| Specificity | 64.3 (54.7, 73.1) |
| PPV | 71.8 (63.7, 79.1) |
| NPV | 71.3 (61.4, 79.9) |
| AUC | 0.757 (0.698, 0.817) |
| OR | 1.36 (1.24,1.49); p<0.001 |
| Abbreviations: AUC, Area Under the Curve of the Receiver Operating Characteristic; CI, Confidence Interval; NPV, Negative Predictive Value; OR, Odds Ratio; PPV, Positive Predictive Value | |

**Supplementary table 5** CARG BC score’s ability to predict health care use

| Predictor: CARG-BC Score | | | |
| --- | --- | --- | --- |
| **Outcome** | **OR (95% CI)** | **p** | **AUC** |
| Unplanned Clinic | 1.09 (1.00, 1.19) | 0.053 | 0.592 (0.501,0.683) |
| Urgent Care | 1.12 (1.04, 1.22) | 0.003 | 0.635 (0.559,0.711) |
| Hospitalization | 1.18 (1.07, 1.31) | 0.002 | 0.685 (0.603,0.767) |
| Healthcare Utilization | 1.11 (1.04, 1.20) | 0.003 | 0.623 (0.552,0.695) |
| Abbreviations: AUC Area Under the receiver operating characteristic Curve; CI, Confidence Interval; OR, Odds Ratio | | | |

**Supplementary fig 1** Healthcare utilization by CARG-BC score.


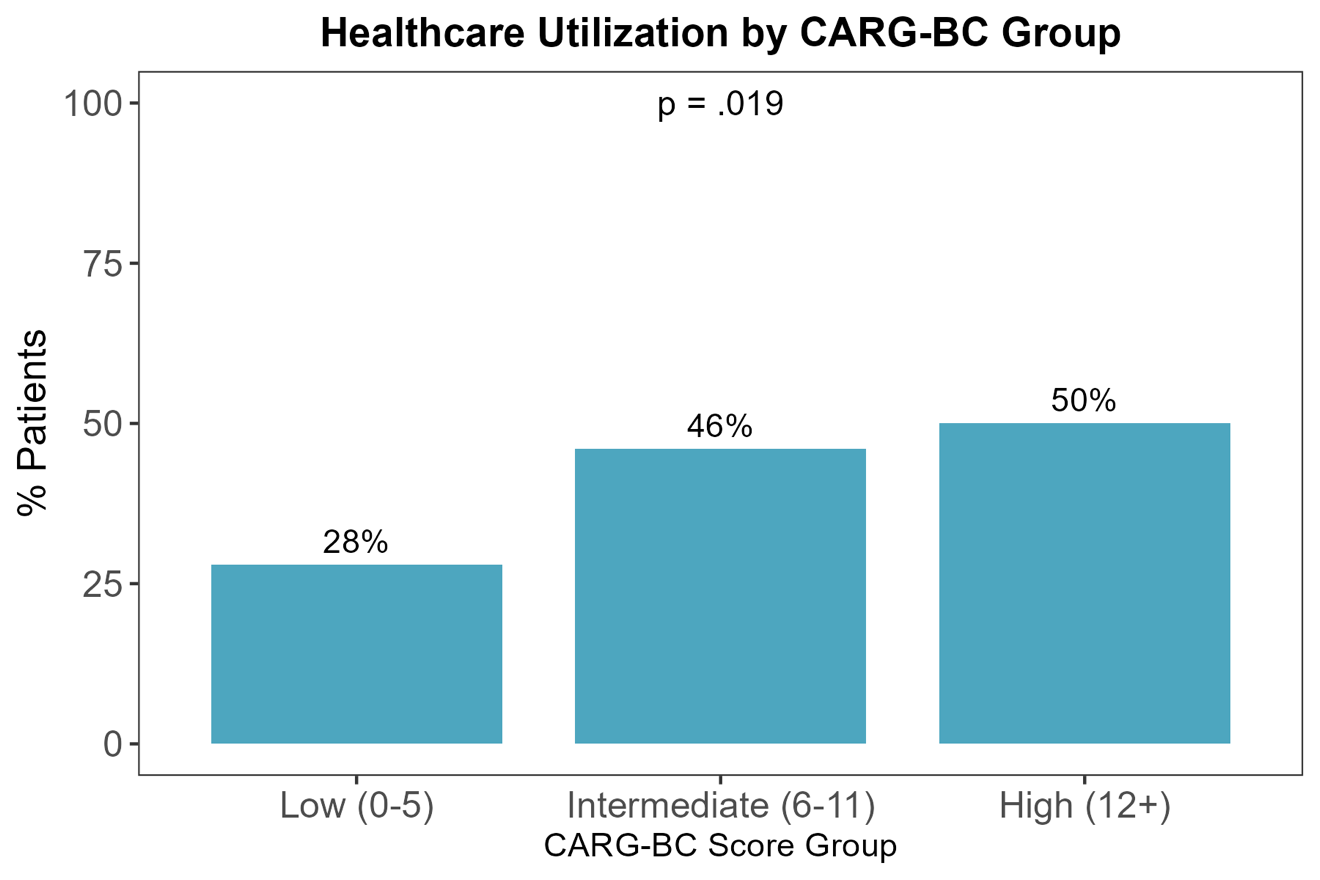


**Supplementary fig 2** Scatterplot with line-of-best fit for the relationship between RDI (%) vs. CARG-BC


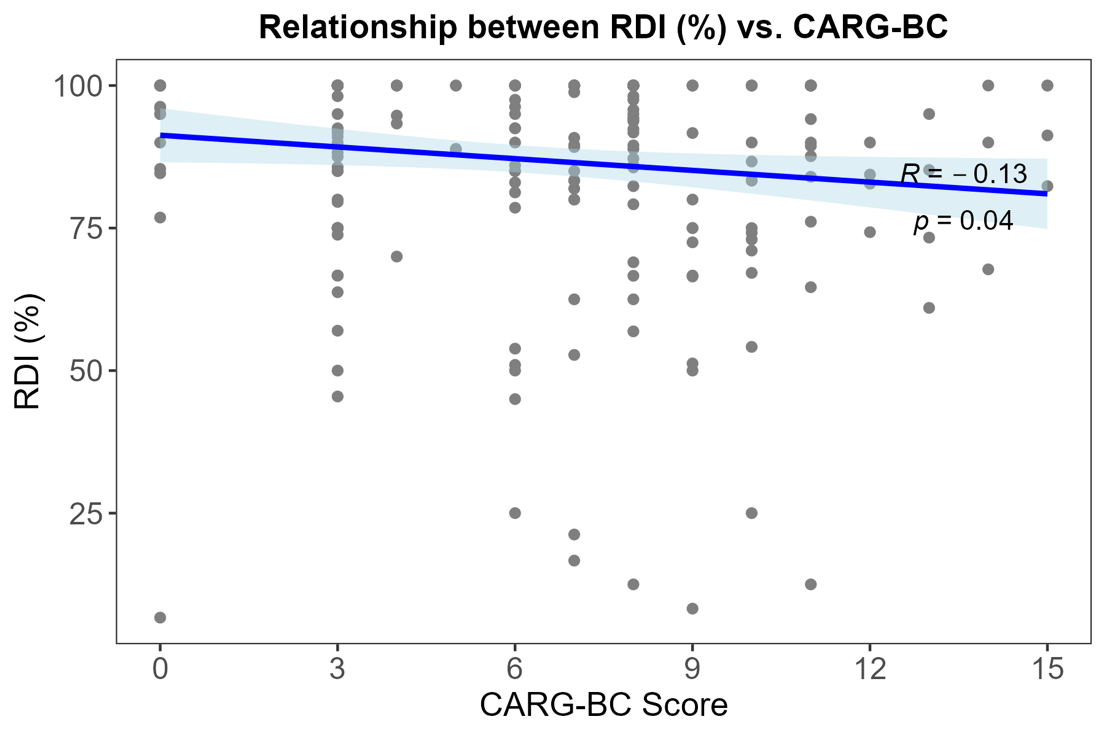


| Linear Regression Model for RDI vs. CARG-BC Score | | | |
| --- | --- | --- | --- |
| Predictors | Estimates | CI | P value |
| (Intercept) | 90.90 | 86.22, 95.59 | <0.001 |
| final CARG-BC score | -0.61 | -1.25, 0.03 | 0.060 |

**Supplementary table 6** CARG-BC score’s ability to predict modifications to chemotherapy protocol

| Predictor: CARG-BC Score | | | |
| --- | --- | --- | --- |
| **Outcome** | **OR (95% CI)** | **p** | **AUC (95% CI)** |
| Dose Delay | 1.17 (1.07, 1.29) | 0.001 | 0.663 (0.575,0.751) |
| Discontinued | 1.05 (0.96, 1.15) | 0.269 | 0.560 (0.473,0.647) |
| Dose Reduction | 1.08 (1.01, 1.16) | 0.031 | 0.582 (0.511,0.653) |
| Dose Reduction (No Upfront) | 1.09 (1.02, 1.18) | 0.016 | 0.594 (0.521,0.668) |
| RDI <85% | 1.10 (1.02, 1.18) | 0.017 | 0.602 (0.526,0.679) |
| Abbreviations: AUC Area Under the receiver operating characteristic Curve; CI, Confidence Interval; OR, Odds Ratio | | | |

**Supplementary table 7** Differences in clinical characteristics for those who received standard of care treatment vs those who received a modified protocol.

|  | No (n=87) | Yes (n=156) | p-value |
| --- | --- | --- | --- |
| Age |  |  | <0.001 |
| Mean (SD) | 72.3 (4.8) | 69.9 (4.0) |  |
| Median (Min, Max) | 72 (65, 86) | 69 (65, 82) |  |
| CCI |  |  | <0.001 |
| Mean (SD) | 1.0 (1.3) | 0.5 (0.8) |  |
| Median (Min, Max) | 1 (0, 5) | 0 (0, 3) |  |
| Comorbidities |  |  | 0.010 |
| No | 9 (10.3) | 39 (25.0) |  |
| Yes | 78 (89.7) | 117 (75.0) |  |
| BMI |  |  | 0.048 |
| Mean (SD) | 28.6 (6.4) | 27.0 (5.1) |  |
| Median (Min, Max) | 28.6 (17.0, 44.1) | 26.3 (17.7, 42.6) |  |
| Missing | 1 | 0 |  |
| Education |  |  | 0.92 |
| Primary | 1 (1.1) | 4 (2.6) |  |
| Secondary | 8 (9.2) | 11 (7.1) |  |
| Post secondary diploma or degree | 17 (19.5) | 28 (17.9) |  |
| Post grad | 13 (14.9) | 26 (16.7) |  |
| Unavailable/not available | 48 (55.2) | 87 (55.8) |  |
| Interpreter |  |  | 0.26 |
| No | 73 (83.9) | 140 (89.7) |  |
| Yes | 14 (16.1) | 16 (10.3) |  |
| Living situation |  |  | 0.34 |
| Alone | 29 (33.3) | 41 (26.3) |  |
| With partner | 37 (42.5) | 85 (54.5) |  |
| With family | 20 (23.0) | 27 (17.3) |  |
| With roommates | 0 (0.0) | 1 (0.6) |  |
| Unavailable/not available | 1 (1.1) | 2 (1.3) |  |
| Working status |  |  | 0.012 |
| Working full time | 6 (6.9) | 26 (16.7) |  |
| Retired | 61 (70.1) | 111 (71.2) |  |
| Working part time | 4 (4.6) | 9 (5.8) |  |
| Disabled | 0 (0.0) | 1 (0.6) |  |
| Never worked (home maker etc) | 3 (3.4) | 1 (0.6) |  |
| Unavailable/not available | 13 (14.9) | 8 (5.1) |  |
| CARG-BC Score |  |  | 0.061 |
| Mean (SD) | 5.8 (3.6) | 6.6 (3.8) |  |
| Median (Min, Max) | 6 (0, 14) | 7 (0, 18) |  |
| Abbreviations: BMI, Body Mass Index; CCI, Charlson’s Comorbidity Index; SD, Standard Deviation | | | |

**References**

1. Magnuson A, Sedrak MS, Gross CP, Tew WP, Klepin HD, Wildes TM, et al. Development and Validation of a Risk Tool for Predicting Severe Toxicity in Older Adults Receiving Chemotherapy for Early-Stage Breast Cancer. JCO [Internet]. 2021 Feb 20 [cited 2023 Aug 28];39(6):608–18. Available from: https://ascopubs.org/doi/10.1200/JCO.20.02063

2. Sedrak MS, Sun CL, Ji J, Cohen HJ, Gross CP, Tew WP, et al. Low-Intensity Adjuvant Chemotherapy for Breast Cancer in Older Women: Results From the Prospective Multicenter HOPE Trial. JCO [Internet]. 2023 Jan 10 [cited 2023 Oct 28];41(2):316–26. Available from: https://ascopubs.org/doi/abs/10.1200/jco.22.01440
